# Supplementary material for: Synthesis of mechanically reinforced silica aerogels via surface-initiated reversible addition-fragmentation chain transfer (RAFT) polymerization
Source: Royal Society of Chemistry journal article supplement (doi:10.1039/c4ta05618c), 2014-11-24
Supplement: c4ta05618c1.pdf [file c4ta05618c1.pdf]

## Synthesis of mechanically reinforced silica aerogels *via* Surface-Initiated Reversible Addition-Fragmentation Chain Transfer (RAFT) Polymerization

H. Maleki <sup>a,\*</sup>, L. Durães <sup>a</sup> and A. Portugal <sup>a</sup>

<sup>a</sup>CIEPQPF, Department of Chemical Engineering, Faculty of Sciences and Technology, University of Coimbra, Rua Sílvio Lima, 3030-790 Coimbra, Portugal.

\*E-mail: [hajar@eq.uc.pt](mailto:hajar@eq.uc.pt)

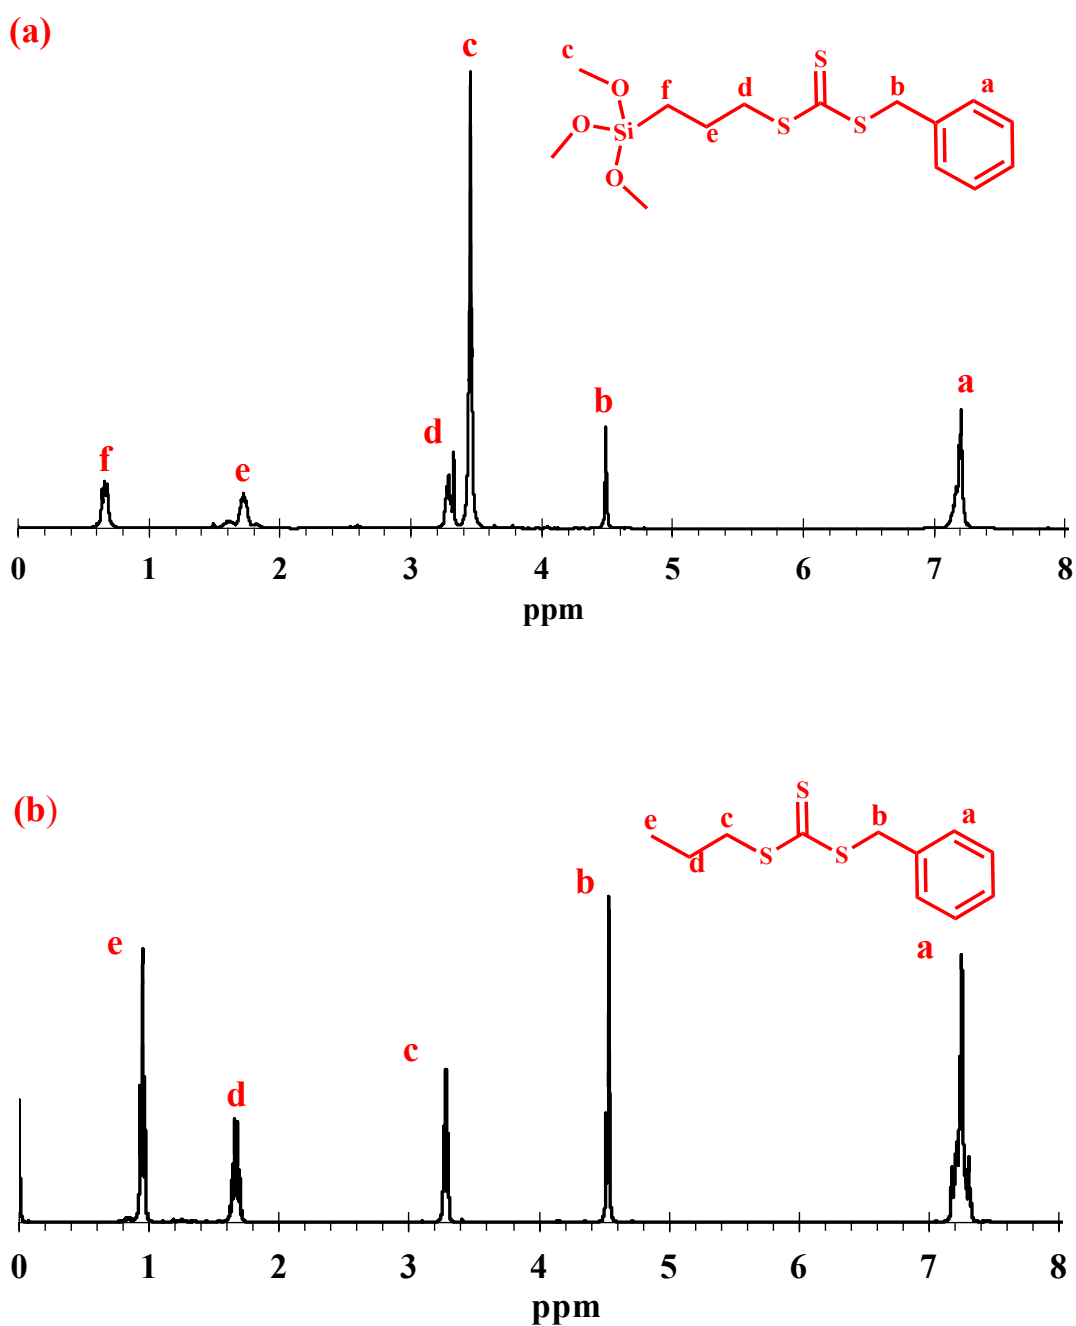

**Fig. S1** <sup>1</sup>H NMR spectra of a) *S*-Benzyl *S'*-trimethoxysilylpropyltrithiocarbonate (BTPT-silica), and b) *S*-benzyl *S'*-propyltrithiocarbonate (BPTT).

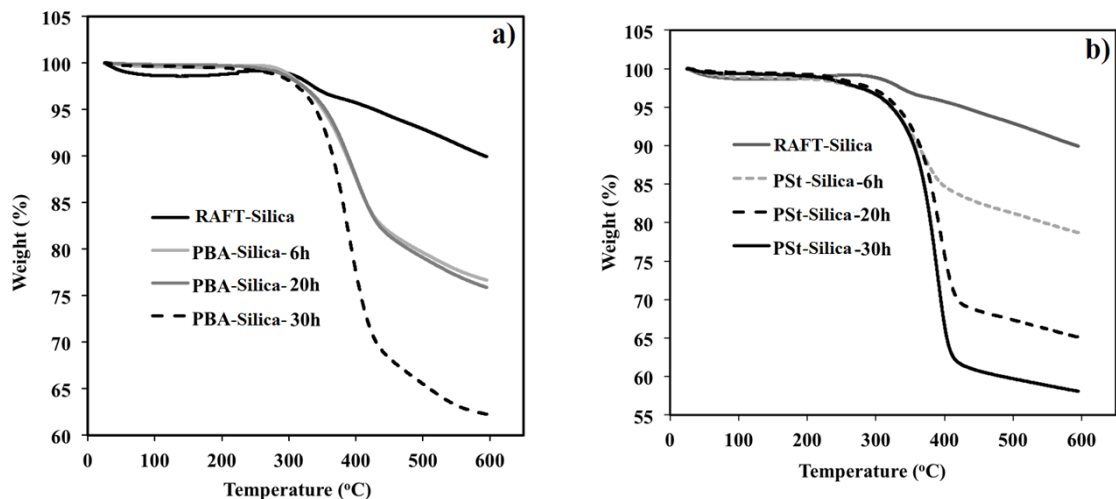

Fig. S2 TGA curves of a) PBA-silica aerogels and b) PSt-silica aerogels.

Table S1. Results of TGA and SEC analysis for RAFT graft polymerization.

| Aerogel        | $T_{\text{onset}}$ (°C) | Wt% polymer <sup>b</sup> | $G_r$ (%) <sup>c</sup> | $G_p$<br>( $\mu\text{mol g}^{-1}$ ) <sup>d</sup> | Initiator<br>efficiency <sup>e</sup><br>(%) |
|----------------|-------------------------|--------------------------|------------------------|--------------------------------------------------|---------------------------------------------|
| 0 <sup>a</sup> | 314                     | -                        | -                      | -                                                | -                                           |
| 6h-PBA         | 336                     | 21                       | 0.16                   | 0.24                                             | 1.4                                         |
| 20h-PBA        | 340                     | 23                       | 0.30                   | 0.44                                             | 2.5                                         |
| 30h-PBA        | 350                     | 36                       | 0.46                   | 0.50                                             | 2.9                                         |
| 6h-PSt         | 320                     | 20                       | 0.15                   | 1.72                                             | 10.1                                        |
| 20h-PSt        | 357                     | 34                       | 0.41                   | 3.20                                             | 19.0                                        |
| 30h-PSt        | 358                     | 40                       | 0.56                   | 4.00                                             | 24.0                                        |

<sup>a</sup>Silica aerogel prepared without PBA/PSt (RAFT-Silica)

<sup>b</sup>Wt%: weight percent of PBA/PSt in PBA- and PSt-silica composites, estimated from TGA data ;

<sup>c</sup>Weight grafting ratio of polymeric chain on silica surface,

$$G_r = \frac{Wt\%_{\text{polymer-silica}}}{100 - Wt\%_{\text{polymer-silica}}} - \frac{Wt\%_{\text{CTA-silica}}}{100 - Wt\%_{\text{CTA-silica}}};$$

$$G_p = \frac{G_r}{M_n(g)};$$

<sup>d</sup>Molar grafting ratio of polymeric chain on silica surface,

<sup>e</sup>Initiator efficiency = no. grafted polymer chains/no. of initiation sites.
